# Supplementary material for: Optimal Central Obesity Measurement Site for Assessing Cardiometabolic and Type 2 Diabetes Risk in Middle-Aged Adults
Source: PLOS journal article supplement (doi:10.1371/journal.pone.0129088), 2015-06-04

|                             |                                                                                                                                                                                                                                                                                                                                                                         |
|-----------------------------|-------------------------------------------------------------------------------------------------------------------------------------------------------------------------------------------------------------------------------------------------------------------------------------------------------------------------------------------------------------------------|
| Title                       | Optimal central obesity measurement site for assessing cardiometabolic and type 2 diabetes risk in middle-aged adults                                                                                                                                                                                                                                                   |
| Authors                     | Millar, Sean R.;Perry, Ivan J.;Van den Broeck, Jan;Phillips, Catherine M.                                                                                                                                                                                                                                                                                               |
| Publication date            | 2015                                                                                                                                                                                                                                                                                                                                                                    |
| Original Citation           | Millar SR, Perry IJ, Broeck JVd, Phillips CM (2015) Optimal Central Obesity Measurement Site for Assessing Cardiometabolic and Type 2 Diabetes Risk in Middle-Aged Adults. PLoS ONE 10(6): e0129088. doi:10.1371/journal.pone.0129088                                                                                                                                   |
| Type of publication         | Article (peer-reviewed)                                                                                                                                                                                                                                                                                                                                                 |
| Link to publisher's version | 10.1371/journal.pone.0129088                                                                                                                                                                                                                                                                                                                                            |
| Rights                      | © 2015 Millar et al. This is an open access article distributed under the terms of the Creative Commons Attribution License, which permits unrestricted use, distribution, and reproduction in any medium, provided the original author and source are credited - <a href="http://creativecommons.org/licenses/by/4.0/">http://creativecommons.org/licenses/by/4.0/</a> |
| Download date               | 2024-04-25 00:41:49                                                                                                                                                                                                                                                                                                                                                     |
| Item downloaded from        | <a href="https://hdl.handle.net/10468/2307">https://hdl.handle.net/10468/2307</a>                                                                                                                                                                                                                                                                                       |

**S1 Figs.** Odds ratios (95% CI) of having non-optimal cardiometabolic risk features for a one standard deviation increase in each obesity measure.

## HIGH TRIGLYCERIDES

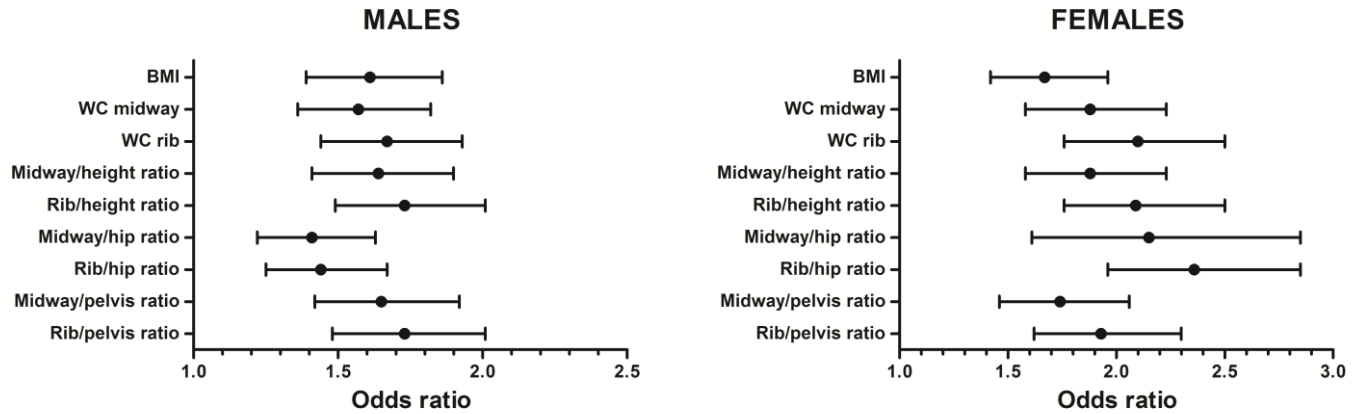

## LOW HDL-C

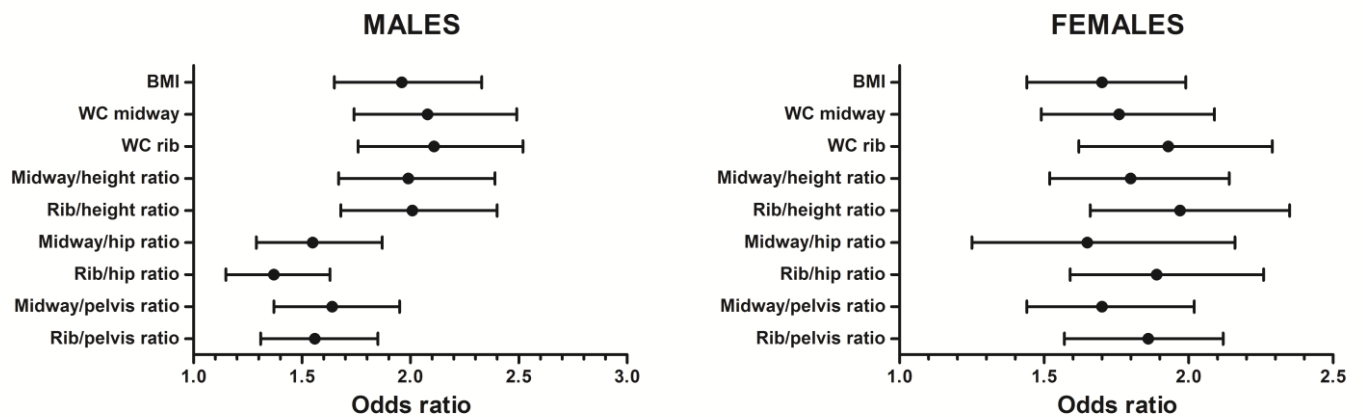

## HIGH BLOOD PRESSURE

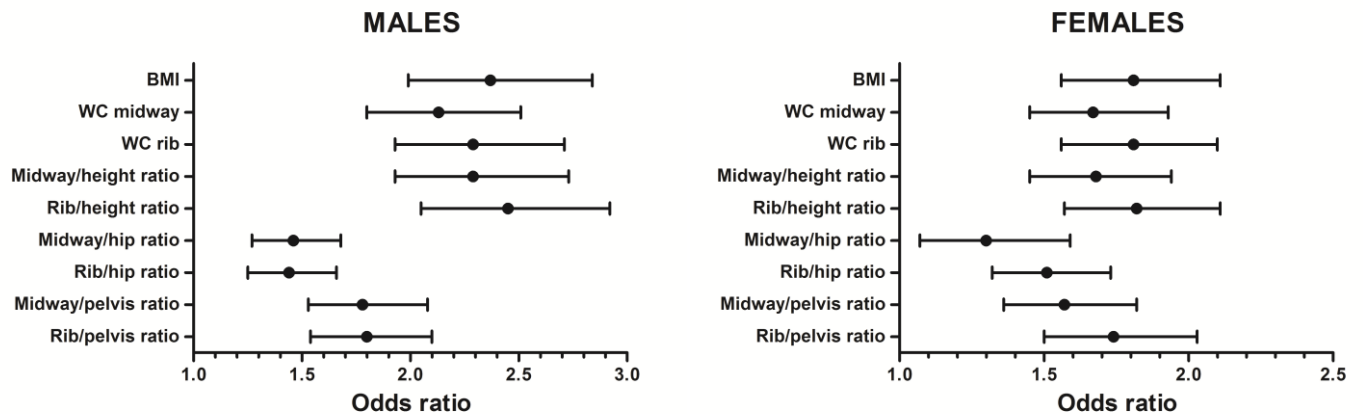

INSULIN RESISTANCE

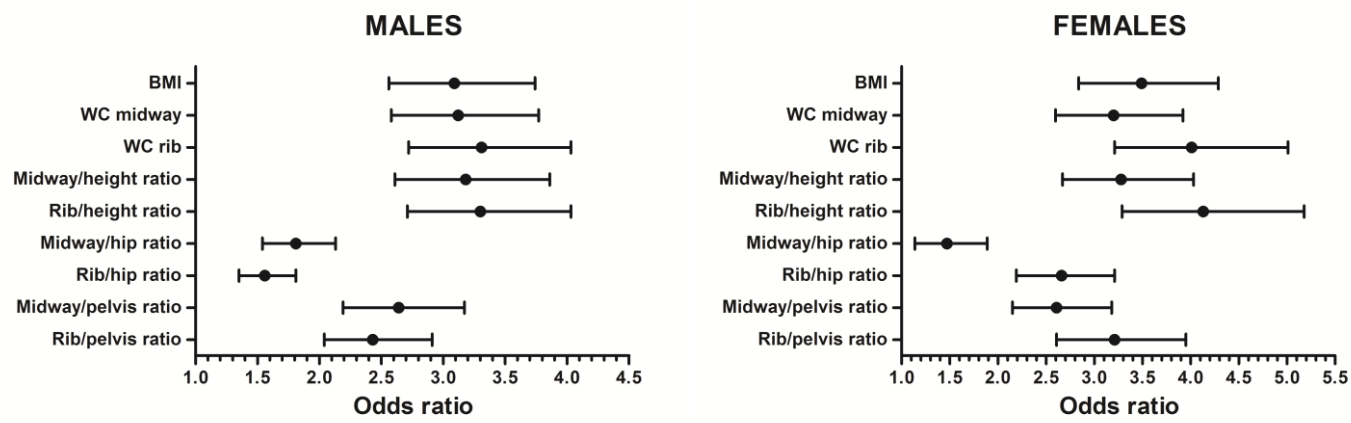

IMPAIRED FASTING GLUCOSE

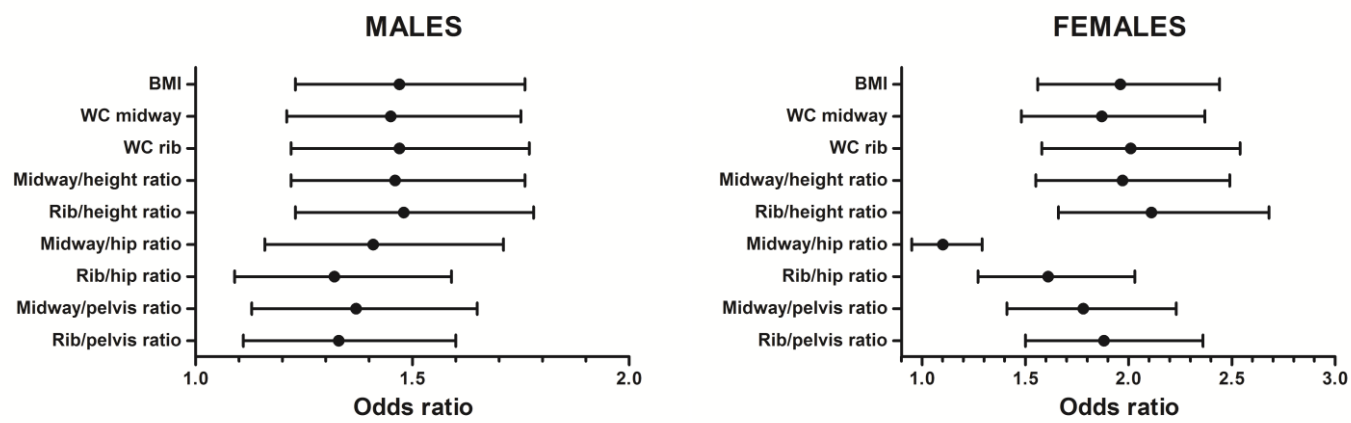

Supplement: S1 (10.1371/journal.pone.0129088.s001) [file journal.pone.0129088.s001.PDF]
