# Supplementary material for: Optimal Central Obesity Measurement Site for Assessing Cardiometabolic and Type 2 Diabetes Risk in Middle-Aged Adults
Source: PLOS journal article supplement (doi:10.1371/journal.pone.0129088), 2015-06-04

**S1 Figs.** Odds ratios (95% CI) of having non-optimal cardiometabolic risk features for a one standard deviation increase in each obesity measure.

**HIGH TRIGLYCERIDES**

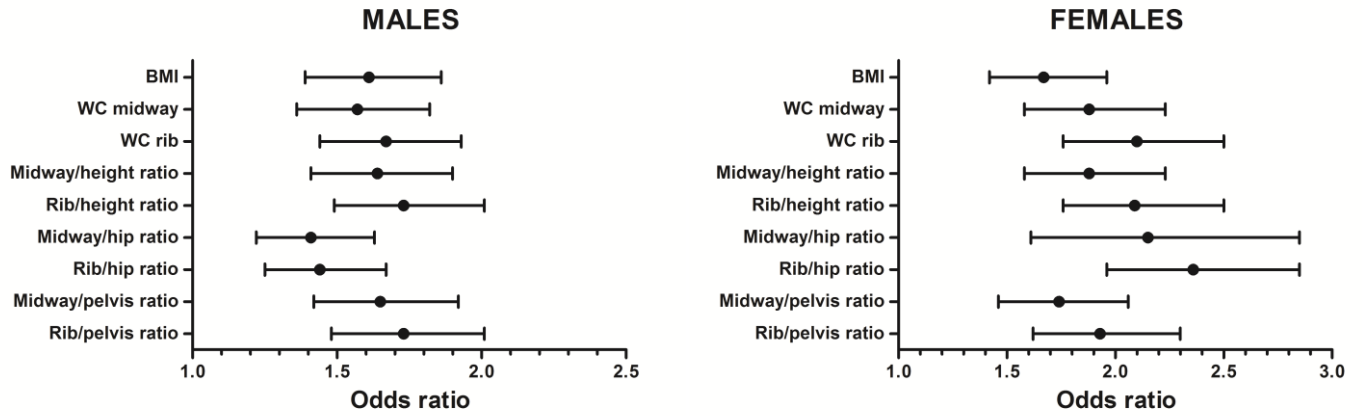

**LOW HDL-C**

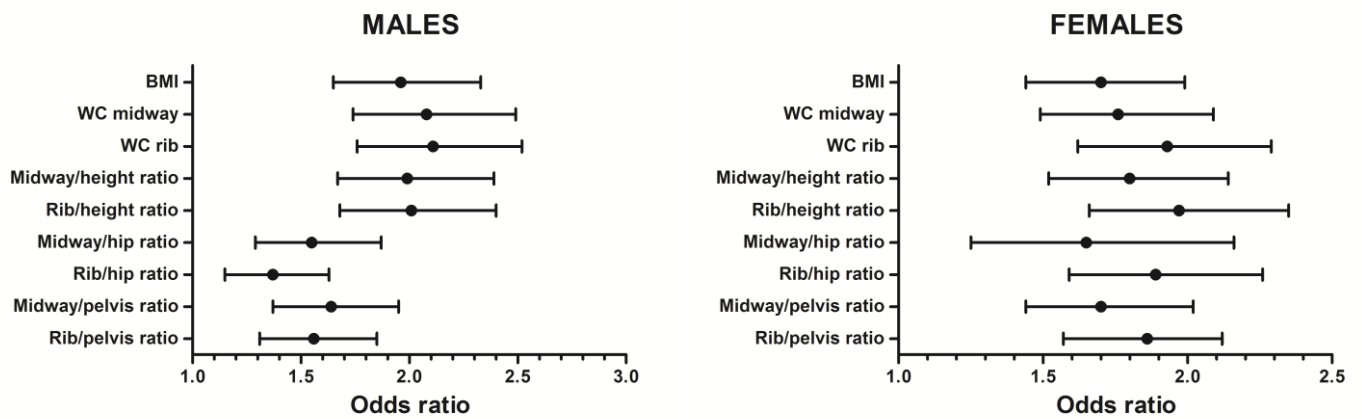

**HIGH BLOOD PRESSURE**

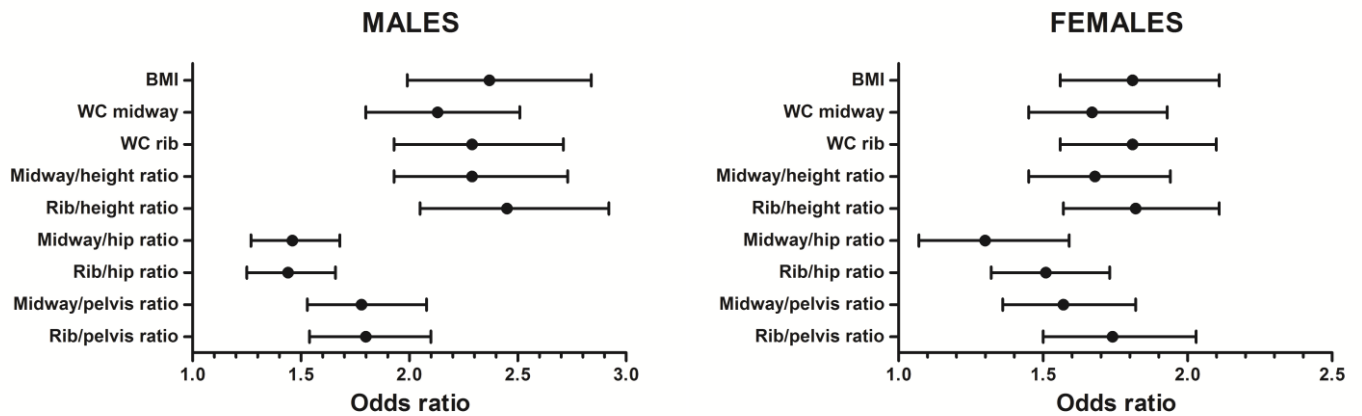

## INSULIN RESISTANCE

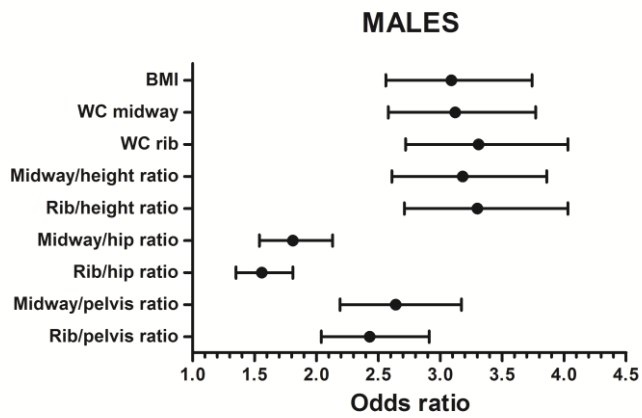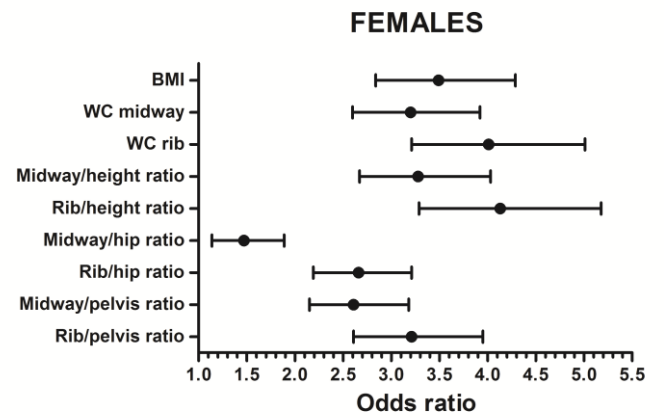

## IMPAIRED FASTING GLUCOSE

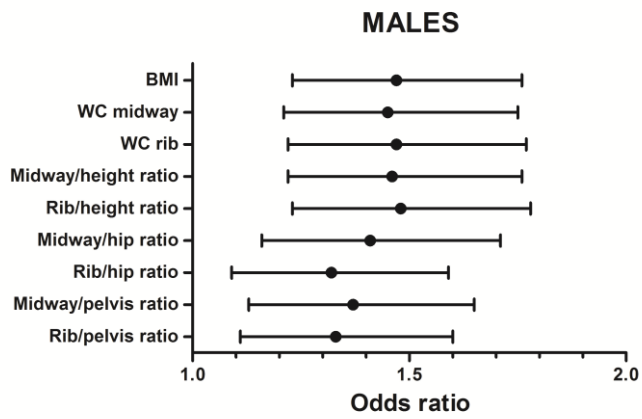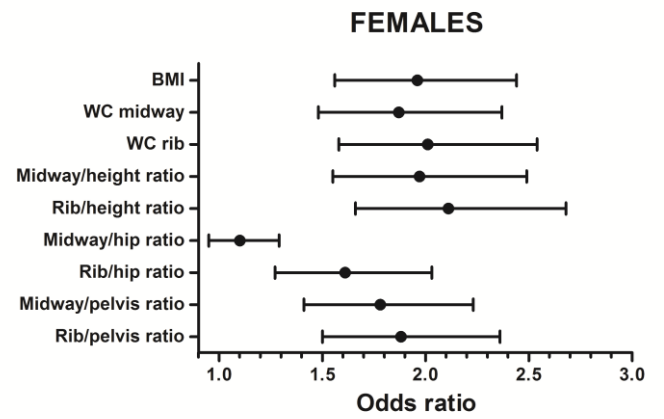

Supplement: S1 (10.1371/journal.pone.0129088.s001) [file journal.pone.0129088.s001]
